# Supplementary material for: Synthesis of azole-linked s-triazine-isatin molecular architectures as nanoscale DNA-targeting agents: a combined spectroscopic and computational study
Source: Royal Society of Chemistry journal article supplement (doi:10.1039/d5na01140j), 2026-04-28
Supplement: d5na01140j1.pdf [file d5na01140j1.pdf]

# Synthesis of Azole-Linked s-Triazine-Isatin Molecular Architectures as Nanoscale DNA-Targeting Agents: A Combined Spectroscopic and Computational Study

Alia Mushtaq, Bibi Nazia, Muhammad Moazzam Naseer\*

*Department of Chemistry, Quaid-i-Azam University, Islamabad 45320, Pakistan*

\*Corresponding author: [moazzam@qau.edu.pk](mailto:moazzam@qau.edu.pk) (M. M. Naseer)

## 1. Substrates and Reagents

All required reagents were supplied by Sigma Aldrich, and Alfa Aesar, and were used without further purification unless otherwise specified. The reactions were performed using standard laboratory equipment. All air-sensitive reactions were carried out under a nitrogen atmosphere using oven-dried glassware. Low temperatures were achieved using an ice/water bath (0 °C). All dried solvents were stored over molecular sieves (4Å°).

## 2. Instrumentation

All reactions were stirred using a stirrer plate, a magnetic stirrer bar and heating, if necessary, over a hotplate with a temperature probe control method. Büchi rotavapor was used for evaporation at lower pressures. To monitor the progress of reaction, Thin Layer Chromatography (TLC) was performed by using pre-coated silica plates (Kieselgel-60 F<sub>254</sub>, Merck, Germany). Melting points were determined in open capillaries using Stuart™ (SMP3) melting point apparatus and were uncorrected. FTIR spectra were recorded on Thermo Scientific Nicolet iS10 and Shimadzu IR Affinity-1 Spectrometer to confirm the presence of different functional groups in the target molecules in the range of 4000-400 cm<sup>-1</sup>. <sup>1</sup>H NMR and <sup>13</sup>C NMR spectra were recorded on Bruker DPX 300 MHz apparatus were referenced to the residual proton solvent peak CDCl<sub>3</sub>, δ 7.26 ppm (1H: H<sub>2</sub>O, δ 1.56 ppm); DMSO-*d*<sub>6</sub>, δ 2.54 ppm (1H: H<sub>2</sub>O, δ 3.33 ppm); CO(CD<sub>3</sub>)<sub>2</sub>-*d*<sub>6</sub>, δ 2.09 ppm (1H: H<sub>2</sub>O, δ 2.84 ppm) and solvent <sup>13</sup>C signal CDCl<sub>3</sub>, δ 77.2 ppm, DMSO-*d*<sub>6</sub>, δ 39.5 ppm, CO(CD<sub>3</sub>)<sub>2</sub>-*d*<sub>6</sub> CO, 205.87 ppm. Chemical shifts δ were reported in ppm downfield of tetramethylsilane (δ = 0 ppm) and coupling constants (*J*) in Hertz.

## 3. Synthesis of 2-hydrazinyl-4,6-diphenoxy-1,3,5-triazine derivatives (3)

The synthesis of 2-hydrazinyl-4,6-diphenoxy-1,3,5-triazine derivatives **3** was carried out according to a previously reported procedure.<sup>74</sup> For the preparation of the

intermediate 2-chloro-4,6-diphenoxy-1,3,5-triazine derivatives **2**, a solution of trichlorotriazine **1** (5.42 mmol, 1 eq.) in dry tetrahydrofuran (THF) was prepared. Substituted phenols (10.85 mmol, 2 eq.) and anhydrous potassium carbonate (16.27 mmol, 3 eq.) were added as nucleophiles and base, respectively. The reaction mixture was stirred at room temperature for 72 hours, and the progress was monitored via thin-layer chromatography (TLC). Upon completion, the reaction mixture was poured into ice-cold water, resulting in the formation of white precipitates **2**, which were subsequently filtered, washed with water, and dried under vacuum. The resulting 2-chloro-4,6-diphenoxy-1,3,5-triazines **2** were then refluxed with hydrazine monohydrate in chloroform to afford the target compounds, 2-hydrazinyl-4,6-diphenoxy-1,3,5-triazine derivatives **3** in good yield.

### 2-Hydrazinyl-4,6-diphenoxy-1,3,5-triazine (3a)

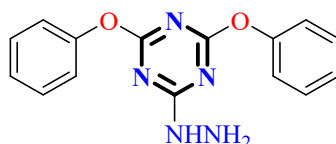

White solid: Yield: 65 %; Melting Point: 106-108 °C;  $R_f$ : 0.5(n-hexane: ethyl acetate, 1:1).

### 2,4-Bis(4-bromophenoxy)-6-hydrazinyl-1,3,5-triazine (3b)

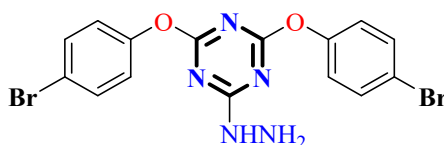

White solid: Yield: 65 %; Melting Point: 183-185 °C;  $R_f$ : 0.45 (n-hexane: ethyl acetate, 3: 7).

### 2,4-Bis(4-phenylphenoxy)-6-hydrazinyl-1,3,5-triazine (3c)

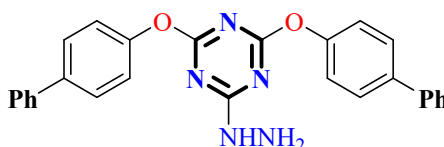

White solid: Yield: 58%; Melting Point: 172-173 °C;  $R_f$ : 0.49 (n-hexane: ethyl acetate, 3: 7).

#### 4. Synthesis of 1-(2-Bromoethyl) Isatin (5)

The synthesis of 1-(2-bromoethyl)isatin **5** was carried out following a previously reported method with slight modifications.<sup>75</sup> A mixture of isatin **4** and anhydrous potassium carbonate was stirred in dimethylformamide (DMF), and this suspension was gradually added dropwise to a solution of 1,2-dibromoethane (4eq) in DMF under continuous stirring. The reaction mixture was stirred at room temperature for 12 hours. Upon completion, as monitored by thin-layer chromatography (TLC), the mixture was poured into ice-cold water, resulting in the formation of an orange-red solid. The product was isolated by filtration, washed with water, and dried. The identity and purity of the product were confirmed by comparison of its physical data with those reported in the literature.

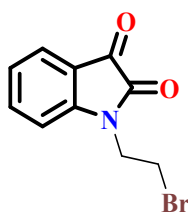

Orange red crystals; Yield: 85%; Melting Point: 126-128 (Lit. 126-128)<sup>75</sup> °C;  $R_f$ : 0.56 (*n*-hexane: ethyl acetate, 7:3).

#### 5. Synthesis of 5-(4-chlorophenyl)-1,3,4-oxadiazole-2-thiol (6c)

The intermediate 5-(4-chlorophenyl)-1,3,4-oxadiazole-2-thiol **6c** was synthesized following a previously reported protocol.<sup>76</sup> The 4-chlorobenzoic acid was esterified by dissolving in ethanol, followed by the addition of a few drops of concentrated sulfuric acid as a catalyst. The reaction mixture was refluxed for 4 hrs, and the resulting ester was extracted using ethyl acetate. Subsequently, ethyl 4-chlorobenzoate (7.21 mmol) was dissolved in ethanol (20 mL) and added dropwise to hydrazine hydrate (36.06 mmol) in a 100 mL round-bottom flask maintained at 78 °C. The reaction progress was monitored by thin-layer chromatography (TLC). After 12 hours of reflux and subsequent cooling, white precipitates of the corresponding acid hydrazide were formed, filtered, and washed thoroughly with water. The obtained acid hydrazide (3.80 mmol) was then stirred in ethanol in the presence of potassium hydroxide (5.74 mmol) until a clear solution was obtained. Carbon disulfide (7.60 mmol) was added dropwise under constant stirring, and the reaction mixture was refluxed for 15 hours. After completion, the reaction mixture was concentrated, cooled, and acidified using dilute

hydrochloric acid. The resulting solid was filtered, washed with water, and recrystallized from ethanol to afford the pure desired product **6c**.

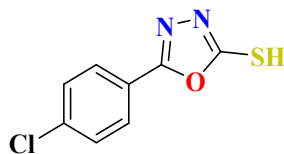

Yellow solid; Yield: 80%; Melting Point: 172-175 (Lit. 171-175)<sup>77</sup> °C;  $R_f$ : 0.46 (*n*-hexane: ethyl acetate, 7:3).

## 6. Synthesis of 5-Phenyl-1H-tetrazole (6d)

The intermediate 5-phenyl-1H-tetrazole **6d** was synthesized following a previously reported protocol.<sup>78</sup> A mixture of benzonitrile (10 mmol), sodium azide (10 mmol), and ammonium chloride (10 mmol) was dissolved in dimethylformamide (DMF) and heated at 125 °C in an oil bath for 7 hours. The reaction progress was monitored periodically using thin-layer chromatography (TLC). Upon completion, the reaction mixture was cooled to room temperature and carefully acidified to pH 2 using concentrated hydrochloric acid, followed by further cooling in an ice-water bath. The resulting white precipitate was collected by filtration, washed thoroughly with water, and dried to afford the pure product.

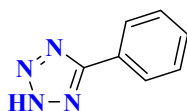

White solid, Yield: 81 % Melting Point: 215-220 (Lit. 215-216)<sup>78</sup> °C;  $R_f^*$ : 0.3 (chloroform: methanol, 8:2).

## 7. Synthesis of Azole-pendant Isatins (7a-d)

For the synthesis of azole-pendant isatins **7a-d**, a solution of the respective azole derivatives **6a-d** (2 mmol) and potassium carbonate (6 mmol, 3 eq.) in dimethylformamide (DMF, 4 mL) was prepared. To this solution, 1-(2-bromoethyl)isatin **5** (2 mmol) was added, and the reaction mixture was stirred at 70-80 °C in an oil bath for 24 hours. The progress of the reaction was monitored using thin-layer chromatography (TLC). Upon completion, the reaction mixture was poured into ice-cold water, resulting in the precipitation of an orange-red solid. The precipitate

was collected by filtration, washed with water, and dried. The crude product was recrystallized from ethanol to afford the pure azole-pendant isatin **7a-d**.

**1-(2-(Benzo[d]thiazol-2-ylthio)ethyl)indoline-2,3-dione (7a)**

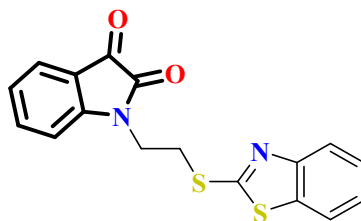

Bright orange; Yield: 80 %; melting point: 152-154 °C;  $R_f$ : 0.42 (ethyl acetate: *n*-hexane, 1:1)

**1-(2-(Benzo[d]oxazol-2-ylthio)ethyl)indoline-2,3-dione (7b)**

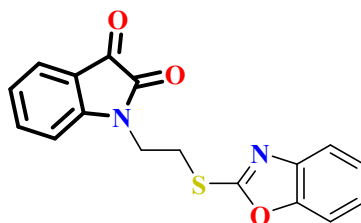

Bright orange; Yield: 75%; Melting Point: 156-157 °C;  $R_f$ : 0.46 (ethyl acetate: *n*-hexane, 1:1)

**1-(2-((5-(4-Chlorophenyl)-1,3,4-oxadiazol-2-yl)thio)ethyl)indoline-2,3-dione (7c)**

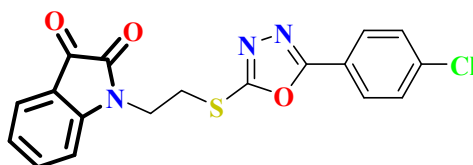

Bright orange; Yield: 78 %; Melting Point: 150-155 °C;  $R_f$ : 0.40 (ethyl acetate: *n*-hexane, 1:1)

**1-(2-(5-Phenyl-2H-tetrazol-2-yl)ethyl)indoline-2,3-dione (7d)**

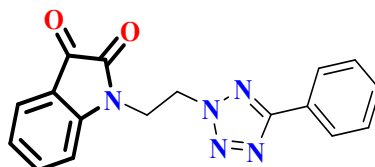

Bright orange; Yield: 74 %; Melting Point: 150-155 °C;  $R_f$ : 0.48 (ethyl acetate: *n*-hexane, 1:1)

## 8. Copies of NMR Spectras

### <sup>1</sup>H NMR spectrum of compound 8

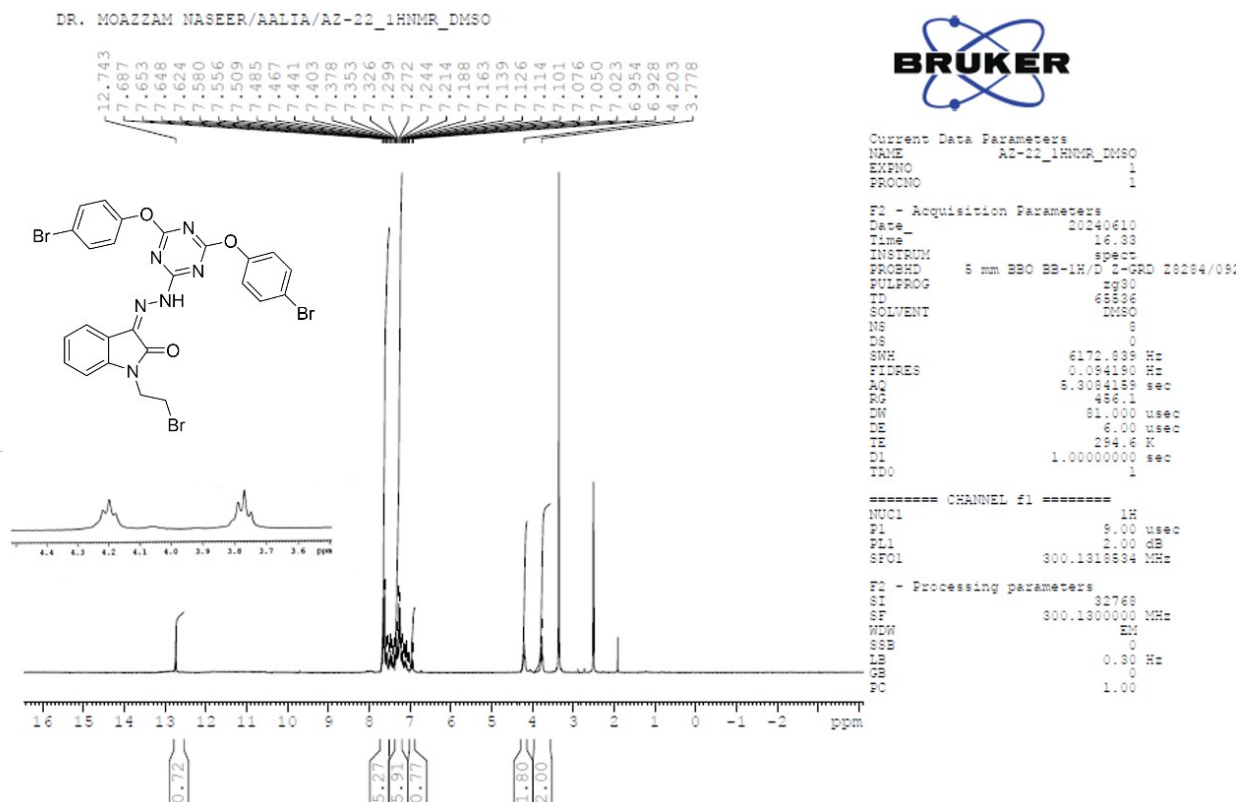

### <sup>13</sup>C NMR spectrum of compound 8

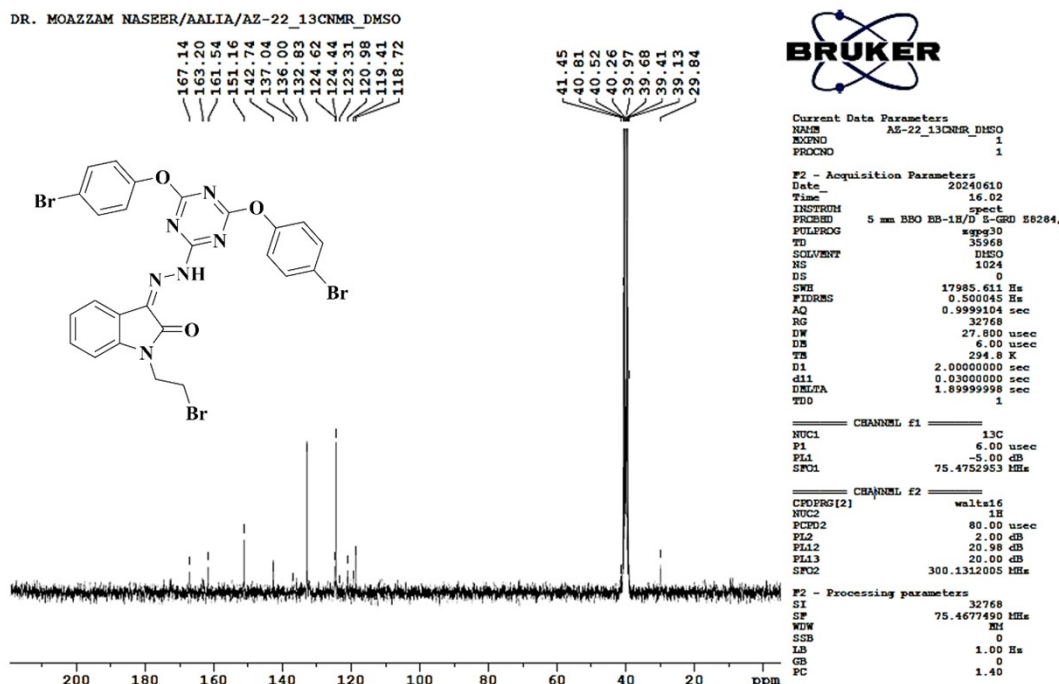

# <sup>1</sup>H NMR spectrum of compound 9a

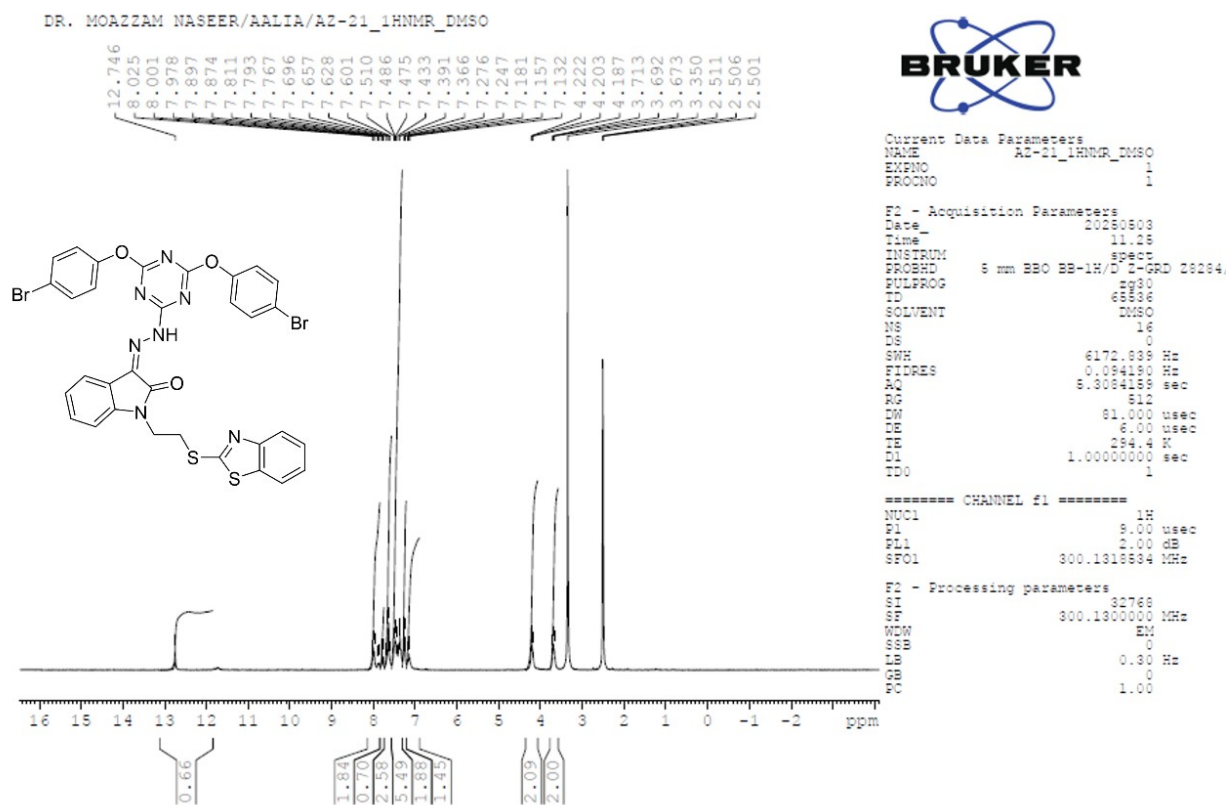

# <sup>13</sup>C NMR spectrum of compound 9a

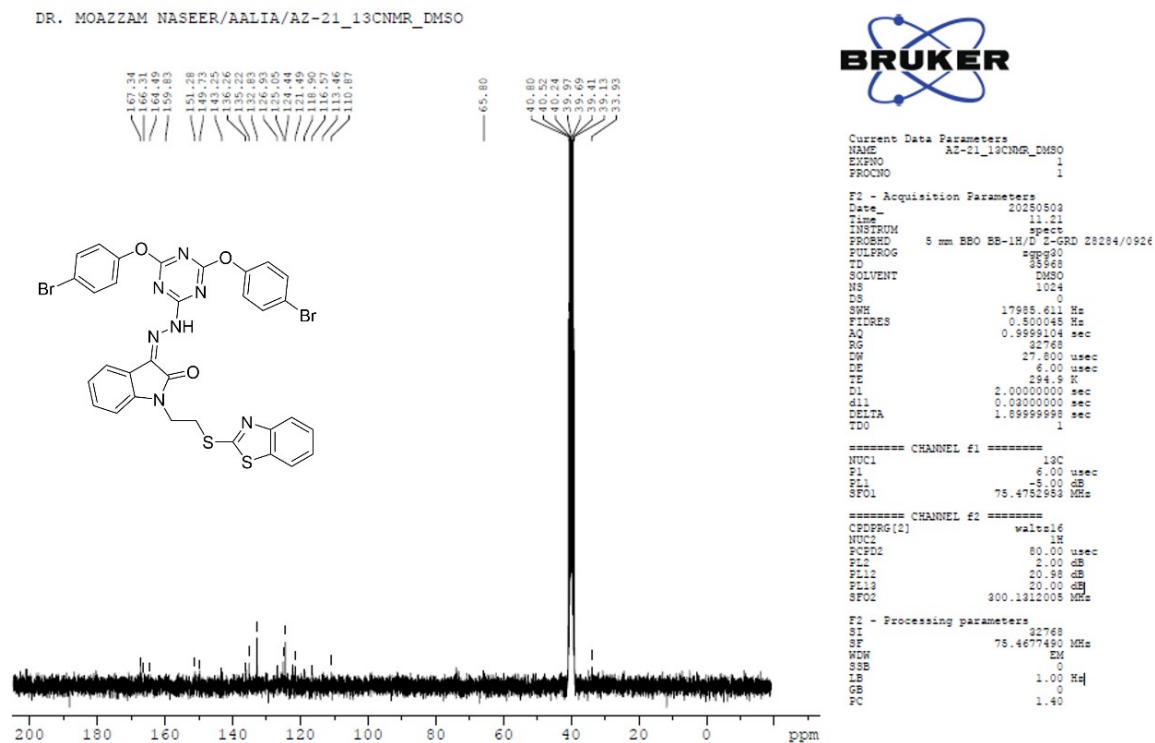

# <sup>1</sup>H NMR spectrum of compound 9b

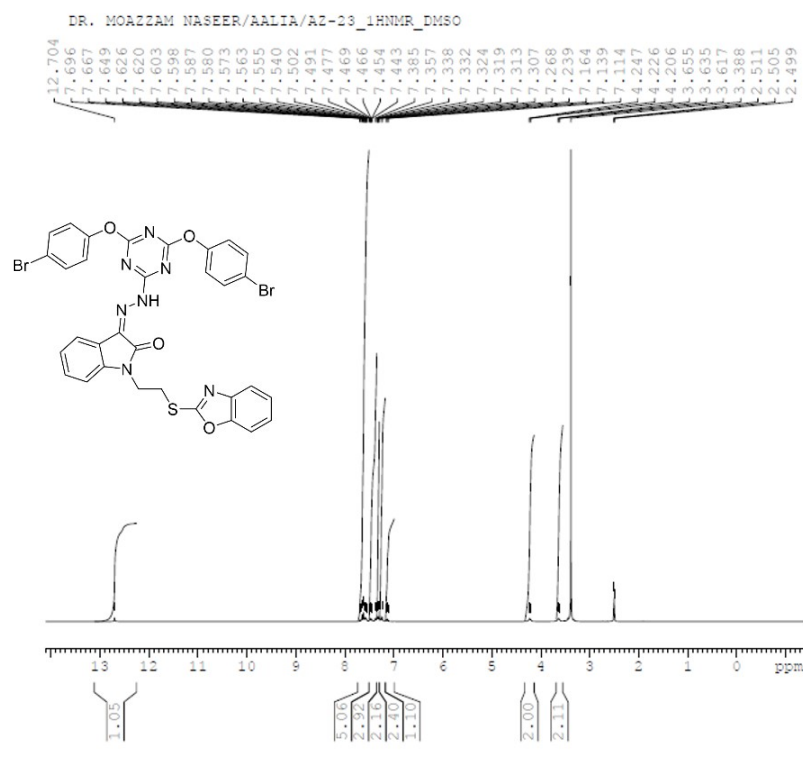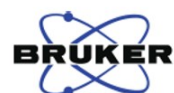

Current Data Parameters

```

NAME      AZ-23_1HNMR_DMSO
EXPNO    1
PROCNO   1

F2 - Acquisition Parameters
Date_    20250503
Time     13.24
INSTRUM  spect
PROBHD   5 mm BBO BB-1H/D 2-GRD ZG234/
PULPROG  zgpg30
TD       65536
SOLVENT  DMSO
NS       16
DS       0
SWH      6172.839 Hz
FIDRES   0.094150 Hz
AQ       5.3094159 sec
RG       256
DM       81.000 usec
DE       6.00 usec
TE       294.1 K
D1       1.00000000 sec
TDO      1

===== CHANNEL f1 =====
NUC1     1H
P1       8.00 usec
PL1      2.00 dB
SFO1     300.1313934 MHz

F2 - Processing parameters
SI       32768
SF       300.1300000 MHz
WDW      EM
SSB      0
LB       0.30 Hz
GB       0
PC       1.00
    
```

# <sup>13</sup>C NMR spectrum of compound 9b

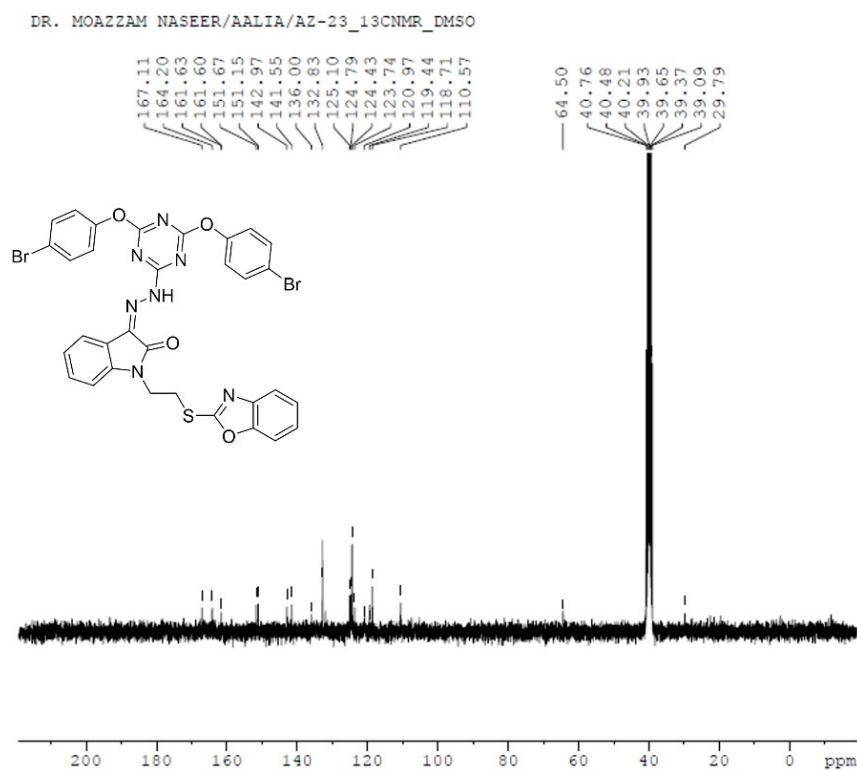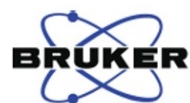

Current Data Parameters

```

NAME      AZ-23_13CNMR_DMSO
EXPNO    1
PROCNO   1

F2 - Acquisition Parameters
Date_    20250503
Time     12.21
INSTRUM  spect
PROBHD   5 mm BBO BB-1H/D 2-GRD ZG234/0926
PULPROG  zgpg30
TD       35568
SOLVENT  DMSO
NS       1024
DS       0
SWH      17985.611 Hz
FIDRES   0.800045 Hz
RG       0.9989104 sec
AQ       32768
DM       27.800 usec
DE       6.00 usec
TE       294.8 K
D1       2.00000000 sec
d11      0.03000000 sec
DELTA    1.89999999 sec
TDO      1

===== CHANNEL f1 =====
NUC1     13C
P1       6.00 usec
PL1      -8.00 dB
SFO1     75.4752952 MHz

===== CHANNEL f2 =====
CPDPRG[2] waltz16
NUC2     1H
PCPD2    80.00 usec
P22      2.00 dB
F22      20.98 dB
F212     20.98 dB
F213     20.00 dB
SFO2     300.1312005 MHz

F2 - Processing parameters
SI       32768
SF       75.4677490 MHz
WDW      EM
SSB      0
LB       1.00 Hz
GB       0
PC       1.40
    
```

# <sup>1</sup>H NMR spectrum of compound 9c

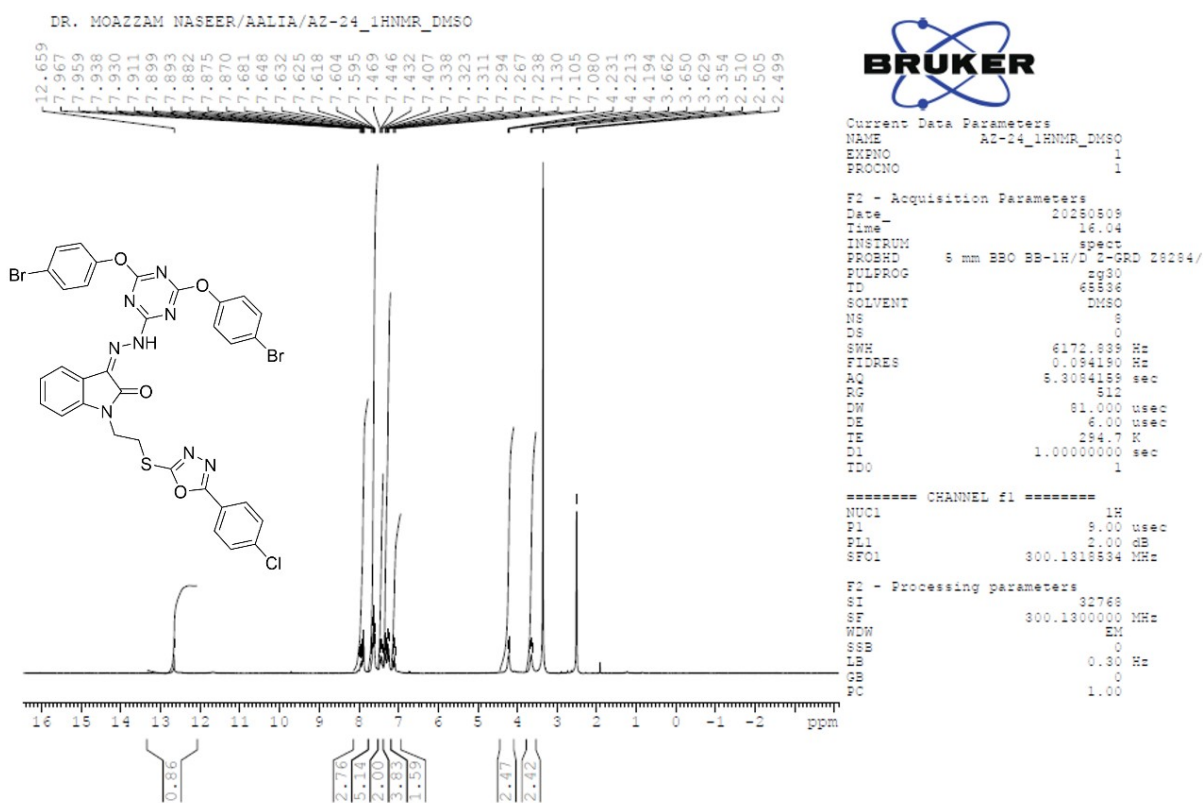

# <sup>13</sup>C NMR spectrum of compound 9c

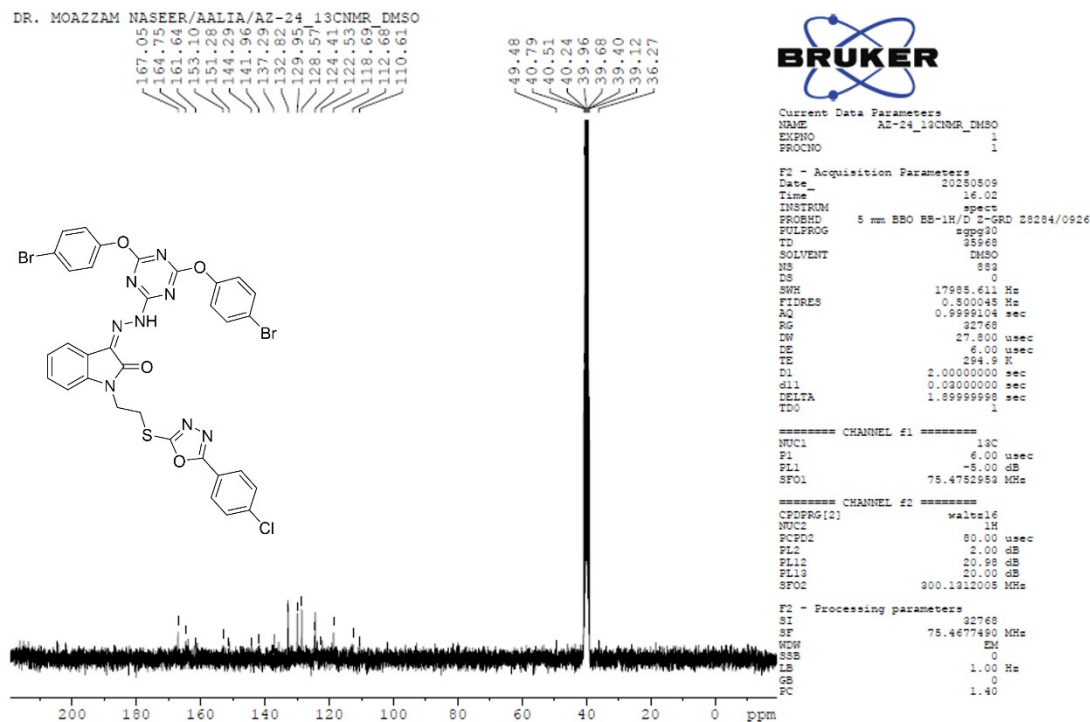

# <sup>1</sup>H NMR spectrum of compound 9d

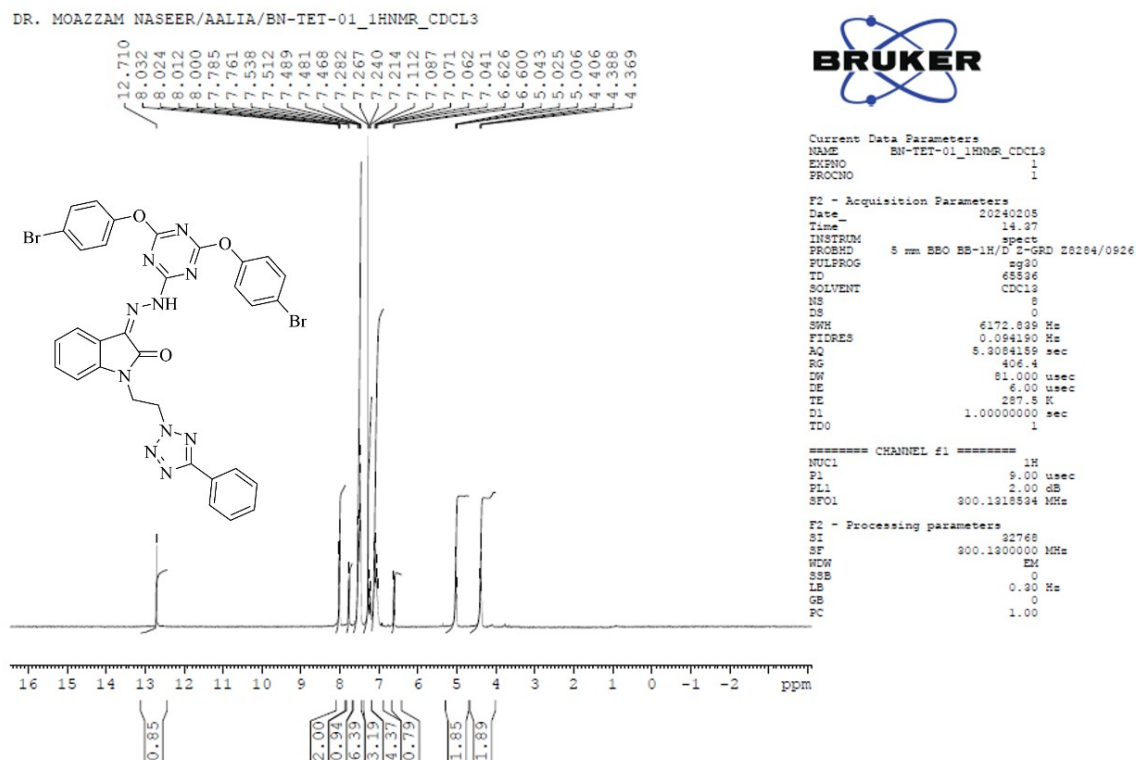

# <sup>13</sup>C NMR spectrum of compound 9d

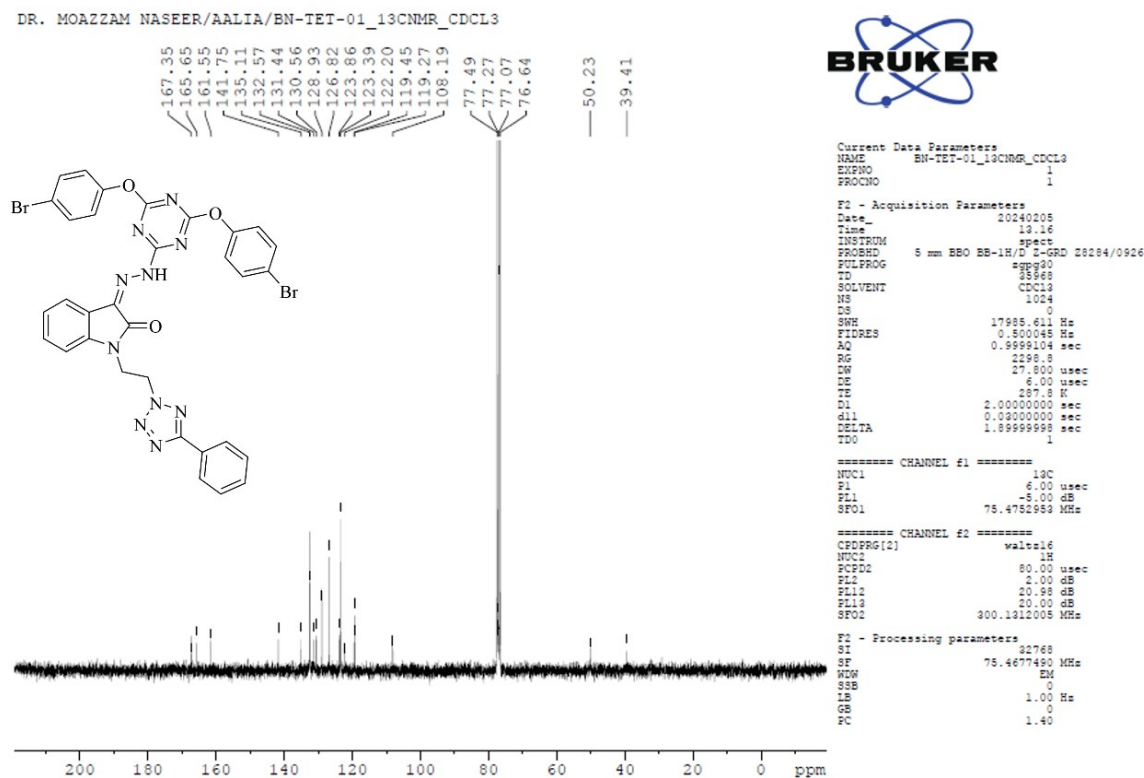

# <sup>1</sup>H NMR spectrum of compound 9e

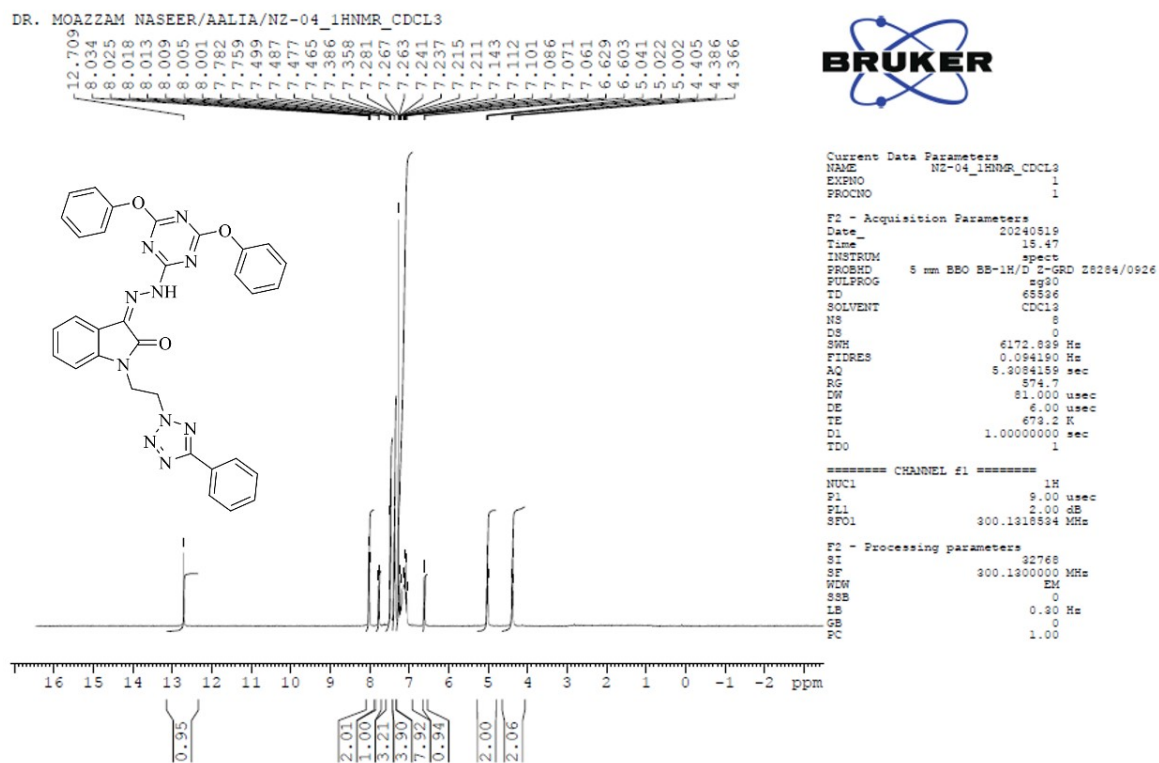

# <sup>13</sup>C NMR spectrum of compound 9e

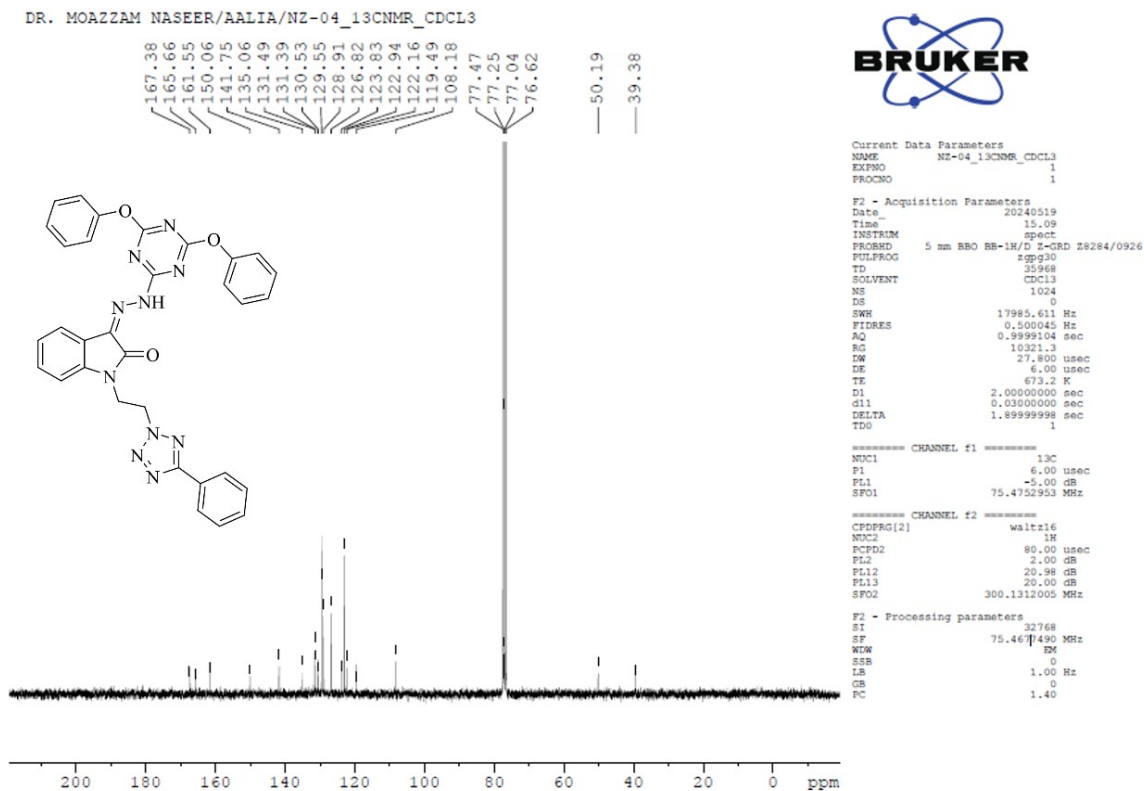

# <sup>1</sup>H NMR spectrum of compound 9f

DR. MOAZZAM NASEER/AALIA/BN-TET-OD\_1HNMR\_CDCL3

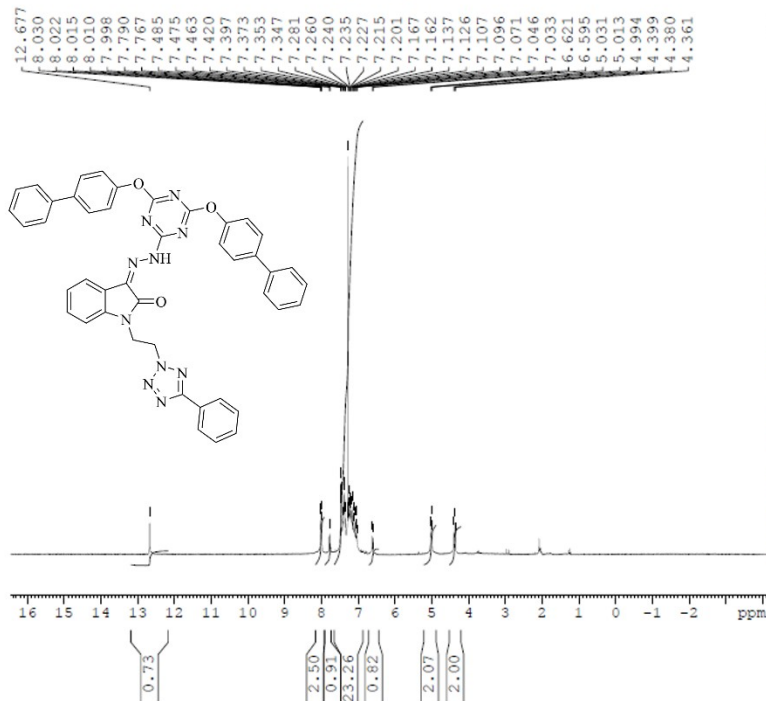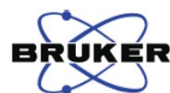

Current Data Parameters  
 NAME BN-TET-OD\_1HNMR\_CDCL3  
 EXPNO 1  
 PROCNO 1

F2 - Acquisition Parameters  
 Date\_ 20240213  
 Time 19.44  
 INSTRUM spect  
 PROBHD 5 mm BBO BB-1H/D 2-GRD 28284/0926  
 PULPROG zgpg30  
 TD 65536  
 SOLVENT CDCL3  
 NS 8  
 DS 0  
 SWH 6172.889 Hz  
 FIDRES 0.094190 Hz  
 AQ 5.2084159 sec  
 RG 362  
 SW 81.000 usec  
 DE 6.00 usec  
 TE 289.7 K  
 D1 1.00000000 sec  
 TDO 1

===== CHANNEL f1 =====  
 NUCL1 1H  
 P1 9.00 usec  
 PL1 2.00 dB  
 SFO1 300.1318550 MHz

F2 - Processing parameters  
 SI 32768  
 SF 300.1300000 MHz  
 WDW EM  
 SSB 0  
 LB 0.30 Hz  
 GB 0  
 PC 1.00

# <sup>13</sup>C NMR spectrum of compound 9f

DR. MOAZZAM NASEER/AALIA/BN-TET-OD\_13CNMR\_CDCL3

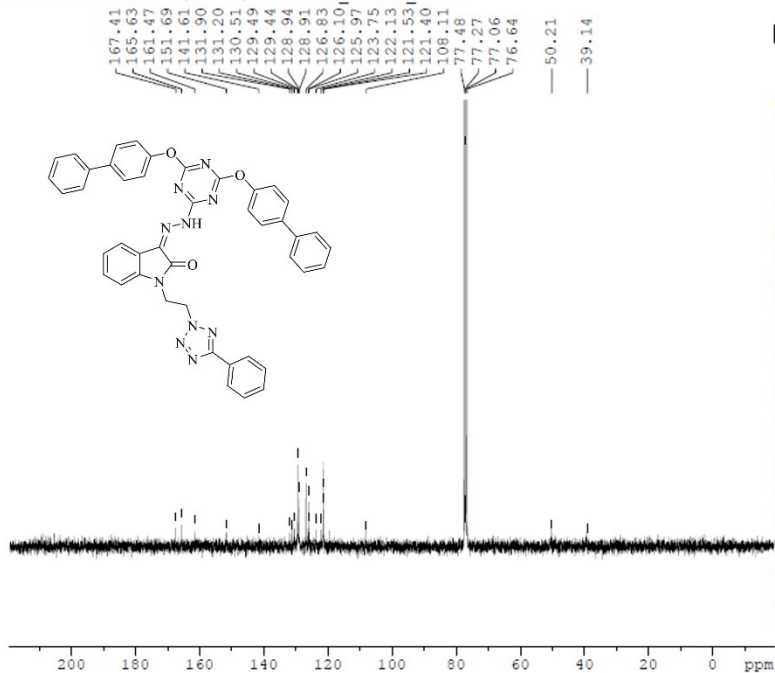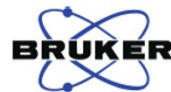

Current Data Parameters  
 NAME BN-TET-OD\_13CNMR\_CDCL3  
 EXPNO 1  
 PROCNO 1

F2 - Acquisition Parameters  
 Date\_ 20240213  
 Time 19.18  
 INSTRUM spect  
 PROBHD 5 mm BBO BB-1H/D 2-GRD 28284/0926  
 PULPROG zgpg30  
 TD 32768  
 SOLVENT CDCL3  
 NS 1024  
 DS 0  
 SWH 17985.611 Hz  
 FIDRES 0.500048 Hz  
 AQ 0.9999104 sec  
 RG 14896.8  
 SW 27.800 usec  
 DE 6.00 usec  
 TE 280.0 K  
 D1 2.00000000 sec  
 d11 0.09000000 sec  
 DELTA 1.89999999 sec  
 TDO 1

===== CHANNEL f1 =====  
 NUCL1 13C  
 P1 6.00 usec  
 PL1 -5.00 dB  
 SFO1 76.4762983 MHz

===== CHANNEL f2 =====  
 CPDPRG2[1] waltz16  
 NUCL2 1H  
 PCPD2 80.00 usec  
 P12 2.00  
 PL12 20.89 dB  
 P13 20.00  
 PL13 20.00 dB  
 SFO2 300.1312008 MHz

F2 - Processing parameters  
 SI 32768  
 SF 76.4677480 MHz  
 WDW EM  
 SSB 0  
 LB 1.00 Hz  
 GB 0  
 PC 1.40

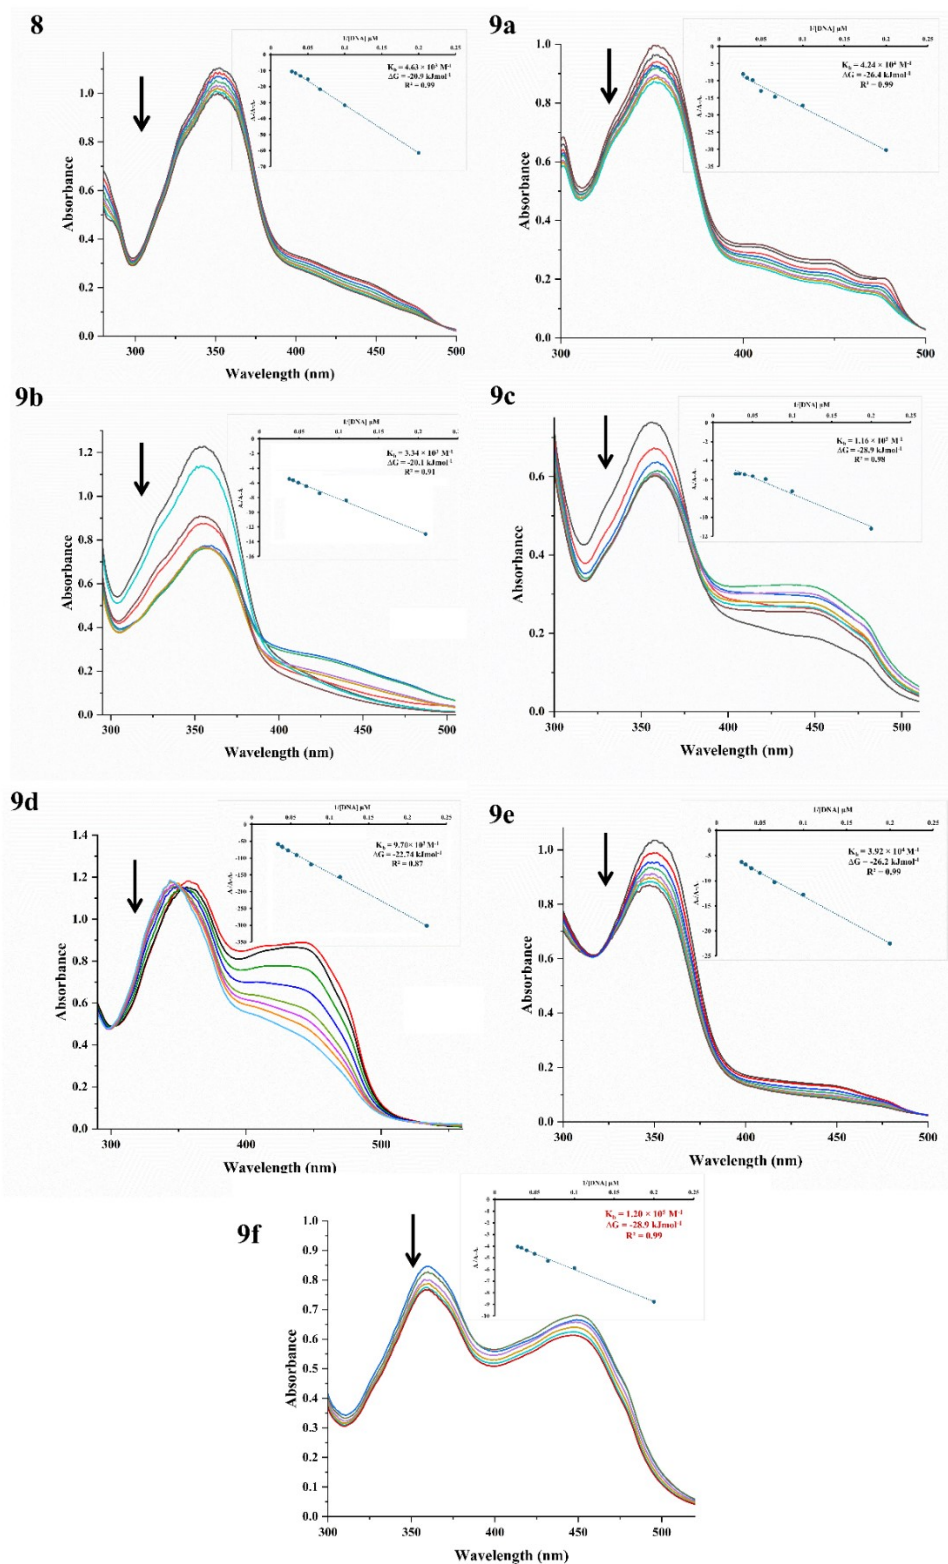

**Figure S1:** UV-Vis absorption spectra of compounds **8** & **9a-f** at pH 7.4 and room temperature, with and without varying SS-DNA concentrations (5–35  $\mu\text{M}$ ), demonstrating spectral shifts indicative of groove binding interactions. Inset: Plot of  $A_0/(A-A_0)$  as a function of  $1/[\text{DNA}]$ .

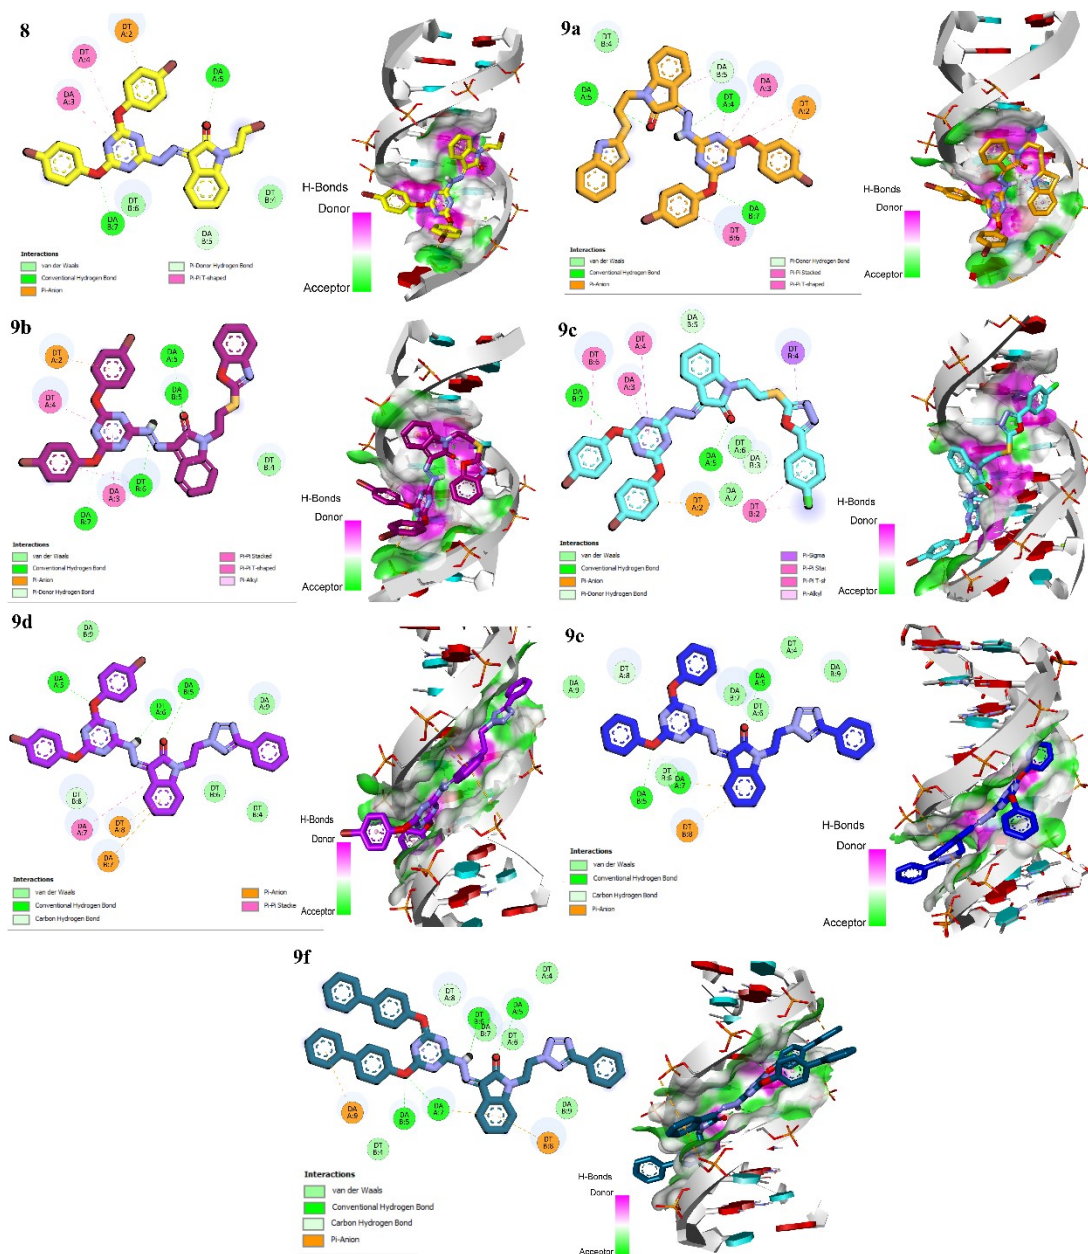

**Figure S2:** 2D & 3D illustrations of docked complexes of compounds **8** & **9a-f** with DNA (3EY0)

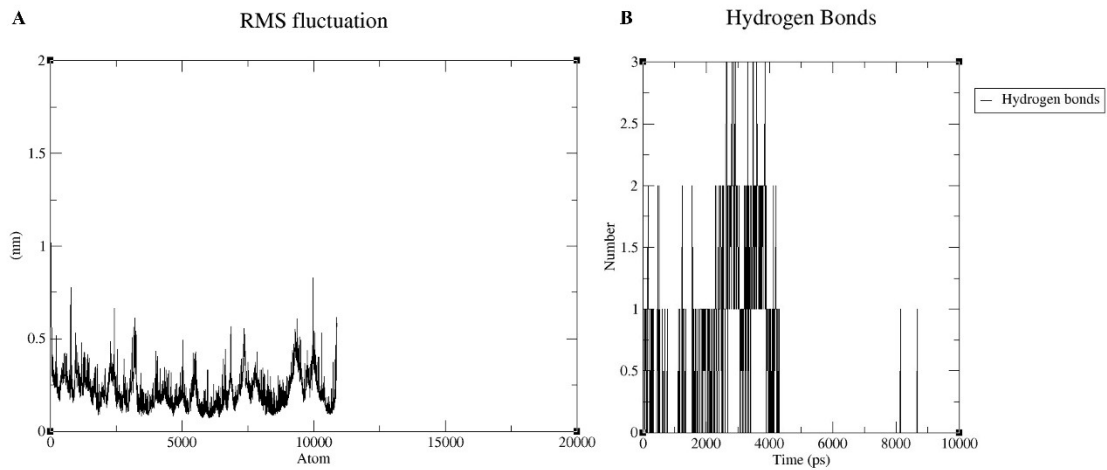

**Figure S3:** Flexibility and hydrogen bonding. (A) RMSF per residue, showing loop fluctuations up to 0.25–0.80 nm (B) Hydrogen bond analysis showing 2–3 persistent H-bonds.

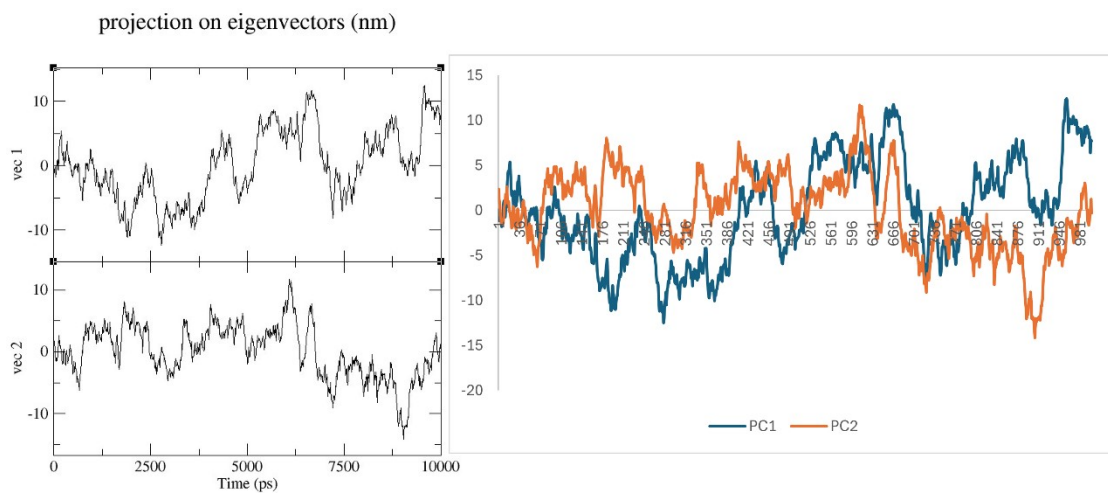

**Figure S4:** PCA scatter plots with PC1+PC2 accounting for 72% of variance.

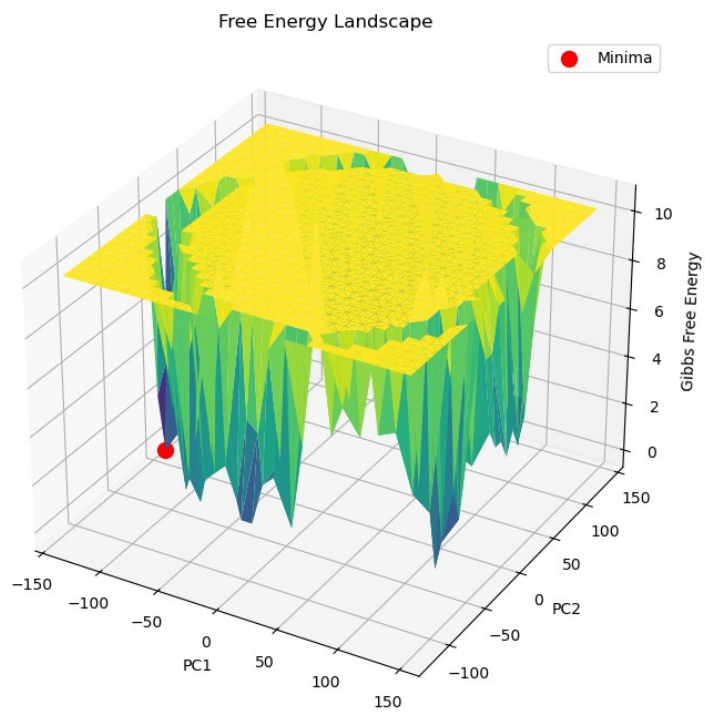

**Figure S5:** FEL along PC1 and PC2.
